# Supplementary material for: Conformational Entropy of Intrinsically Disordered Proteins from Amino Acid Triads
Source: PubMed Central journal article supplement (PMC4490338; doi:10.1038/srep11740), 2015-07-03
Supplement: srep11740-s1.pdf [file srep11740-s1.pdf]

**Supplementary Information**  
Conformational Entropy of Intrinsically  
Disordered Proteins from Amino Acid Triads

Anupaul Baruah, Pooja Rani and Parbati Biswas\*

Department of Chemistry,

University of Delhi,

Delhi: 110007, India.

\*Email: [pbiswas@chemistry.du.ac.in](mailto:pbiswas@chemistry.du.ac.in)

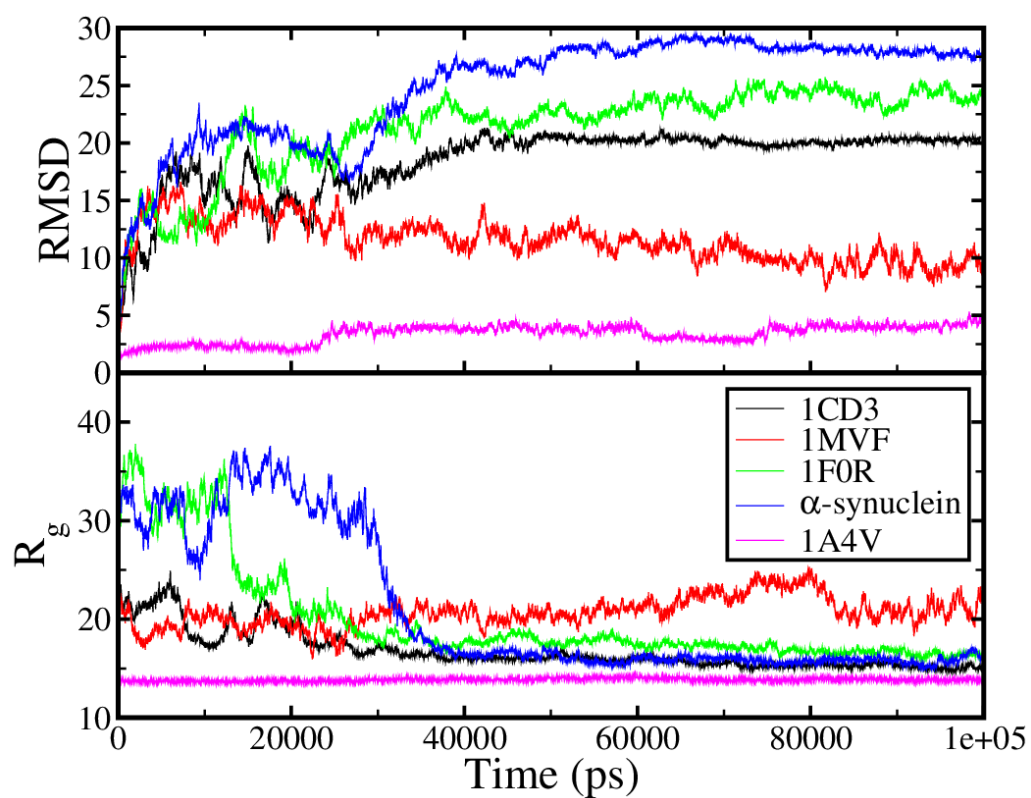

**Supplementary Figure S1.** RMSD (adapted with permission from DOI:10.1021/jp511961c. Copyright 2015 American Chemical Society.) and Radius of gyration ( $R_g$ ) as a function of MD simulation time.

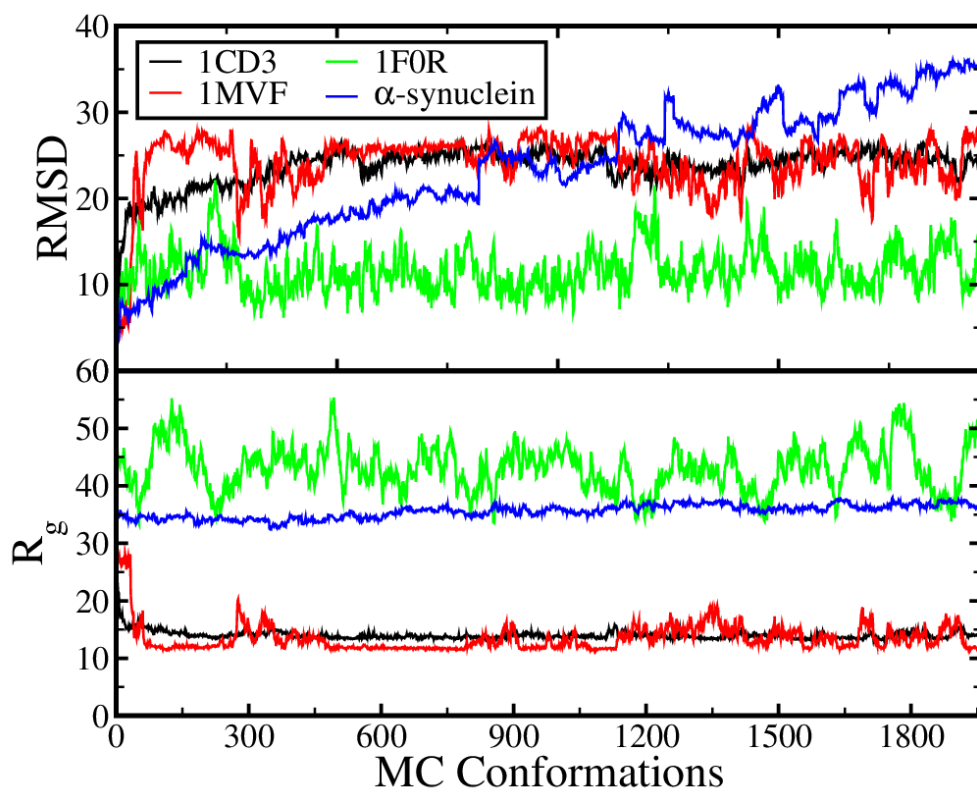

**Supplementary Figure S2.** RMSD and Radius of gyration ( $R_g$ ) as a function of MC generated conformations.

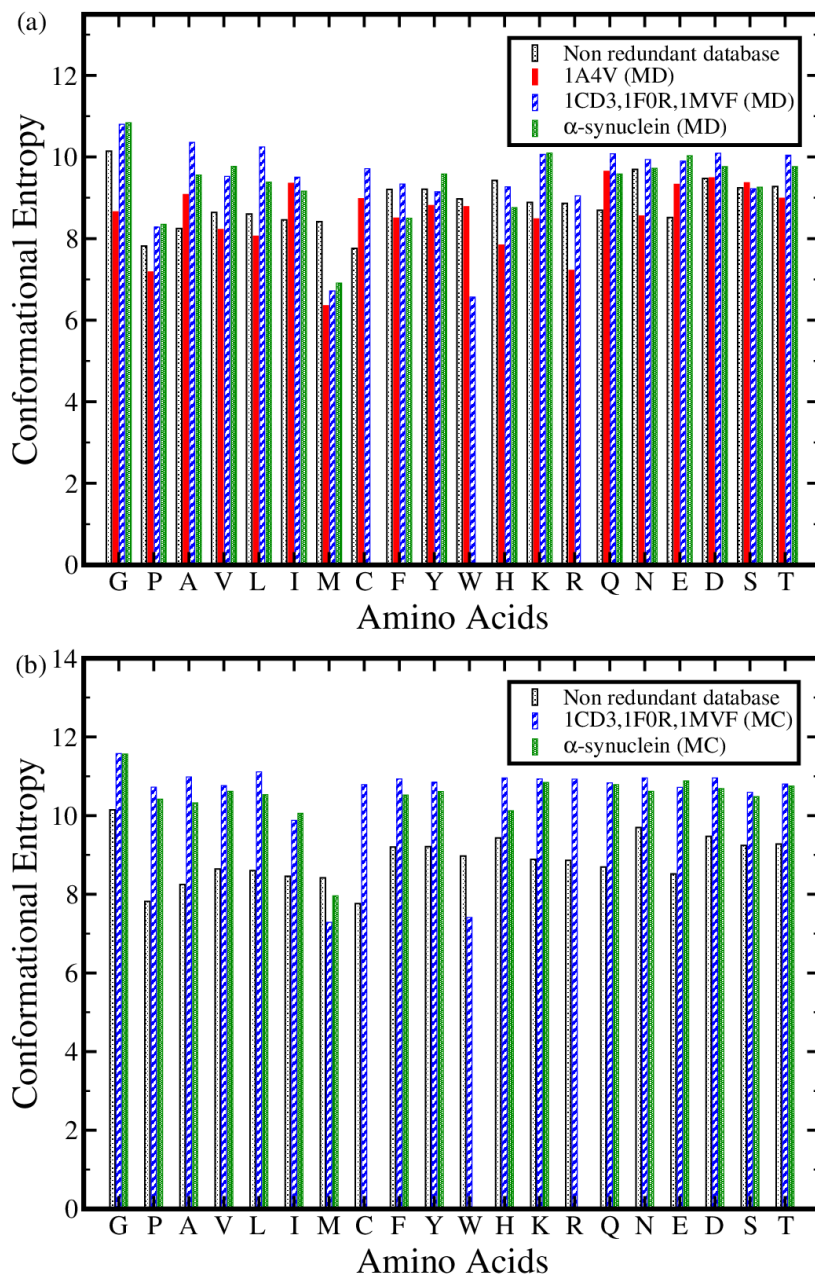

**Supplementary Figure S3.** Residue-wise conformational entropy for ensembles of (a) Molecular dynamics, (b) Monte Carlo generated conformations.

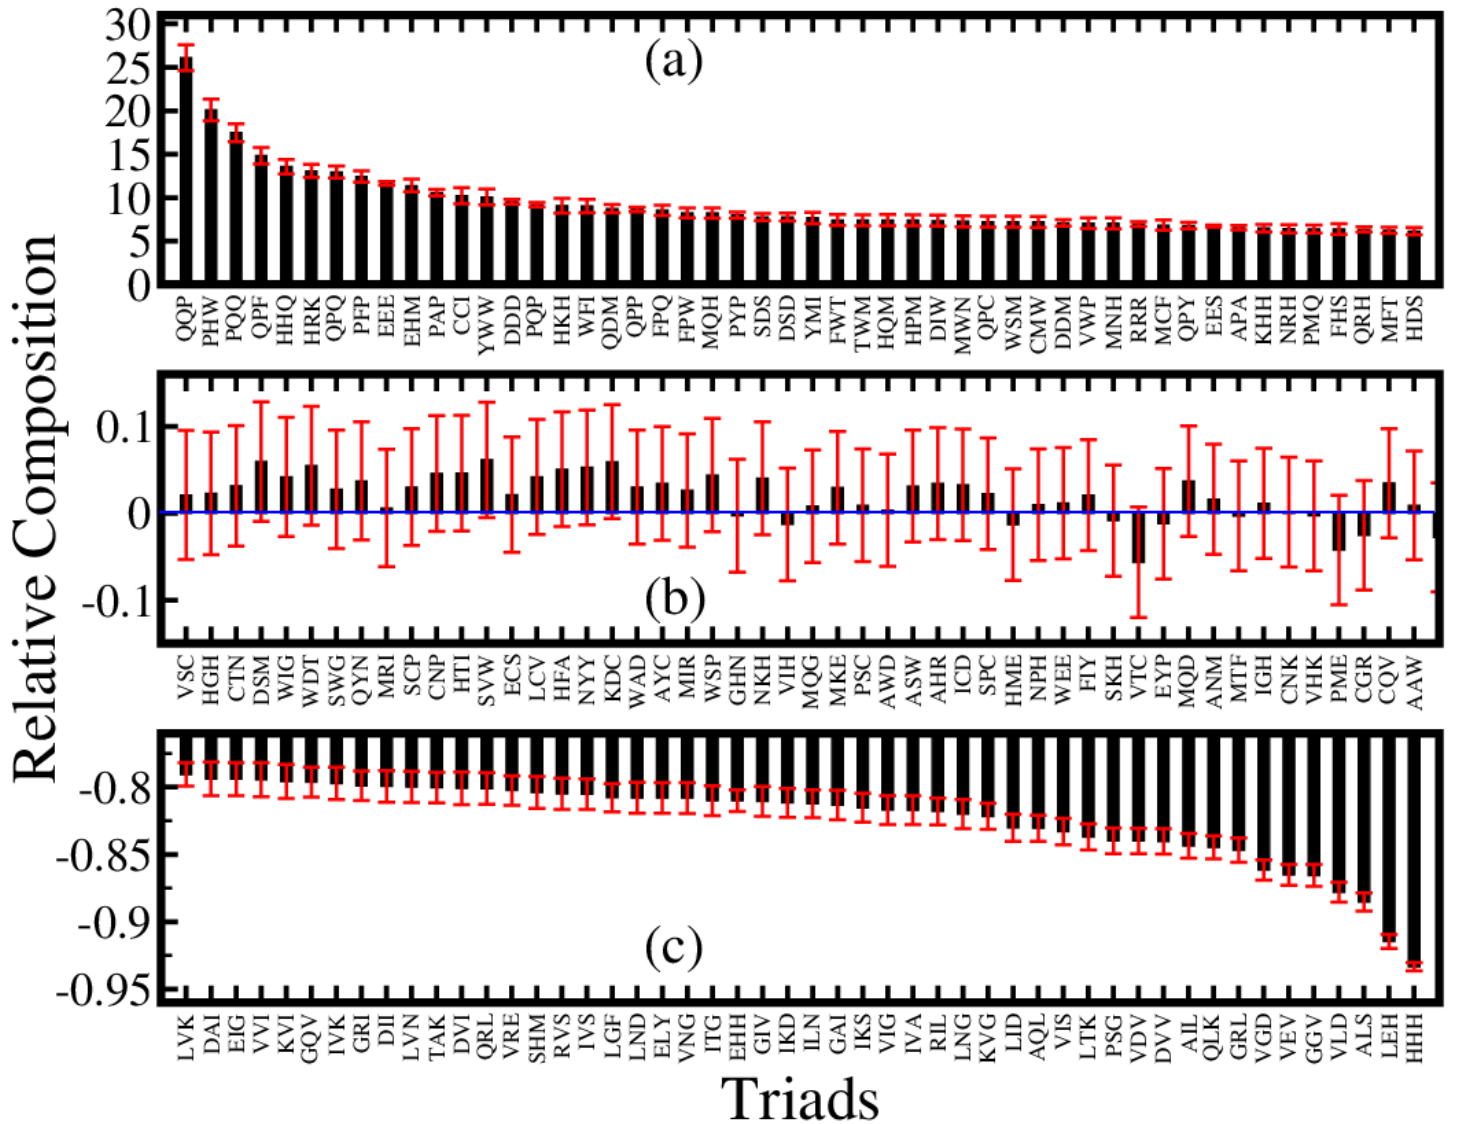

**Supplementary Figure S4.** The relative composition of (a) top 50 most preferred triads, (b) 50 triads with no clear preference and (c) 50 least preferred triads in Group II proteins w.r.t to the Globular proteins. 99% confidence intervals for 2000 bootstrap resampling iterations are also shown. Out of all possible 8000 triads, 2795 triads are not considered in this analysis of which 2756 triads do not exist only in Group II proteins, 2 triads do not exist only in Globular proteins and 37 triads are not present in both Group II and Globular proteins.

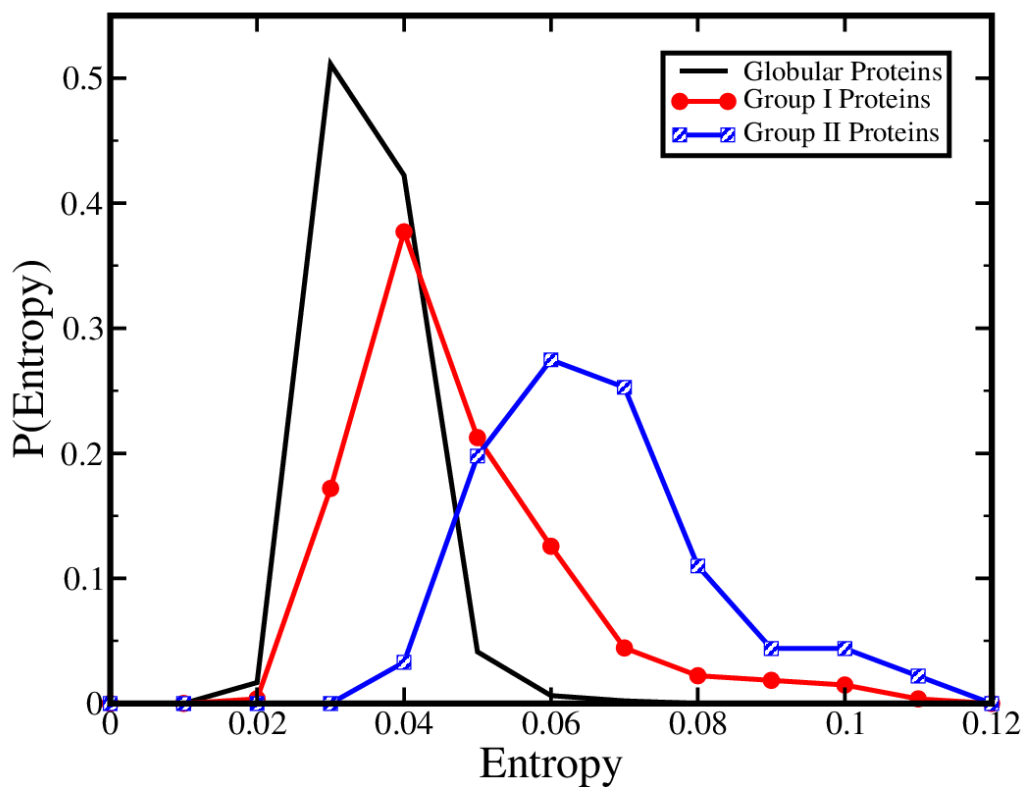

**Supplementary Figure S5.** Distribution of normalized relative composition calculated using triads of amino acid for data set of globular, Group I and Group II proteins. The globular proteins record the lowest normalized relative composition, while Group II proteins depict the highest value.

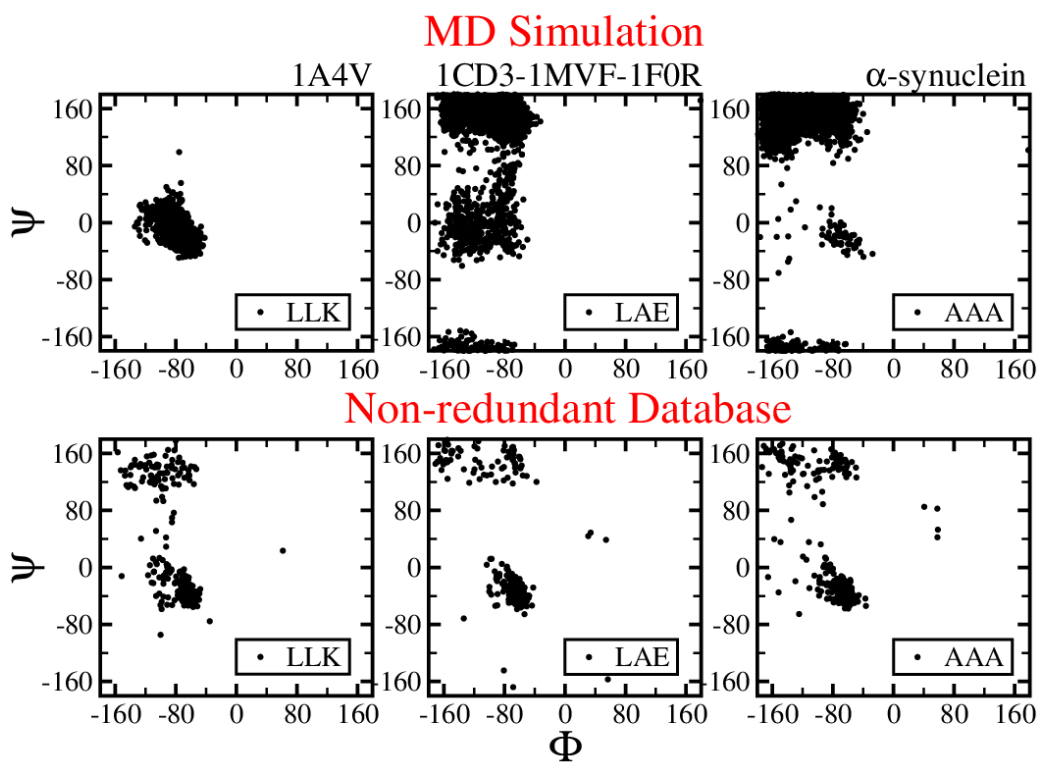

**Supplementary Figure S6.**  $\phi - \psi$  angles of the triad *LLK* in globular (1A4V), *LAE* in IDPRs (1CD3, 1MVF and 1F0R) and *AAA* in IDP ( $\alpha$ -synuclein). The  $\phi - \psi$  angles are extracted from the MD simulation generated conformational ensemble and non-redundant database.

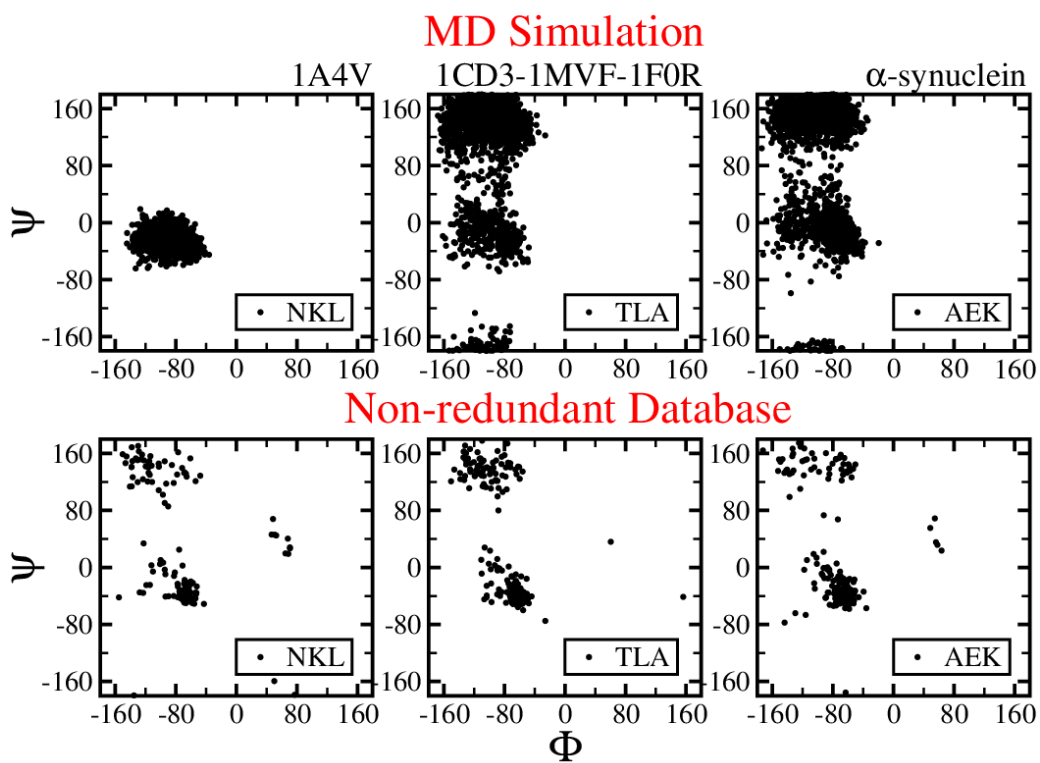

**Supplementary Figure S7.**  $\phi - \psi$  angles of the triad *NKL* in globular (1A4V), *TLA* in IDPRs (1CD3, 1MVF and 1F0R) and *AEK* in IDP ( $\alpha$ -synuclein). The  $\phi - \psi$  angles are extracted from the MD simulation generated conformational ensemble and non-redundant database.



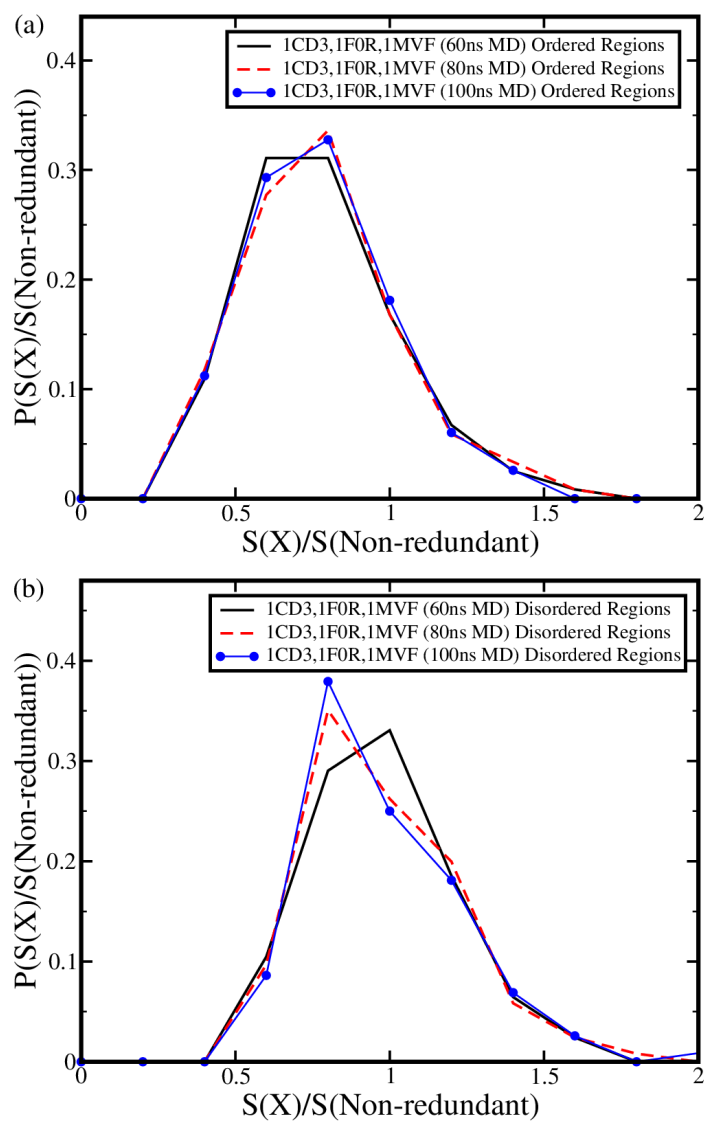

**Supplementary Figure S8.** Conformational entropy calculated using triads relative to non-redundant database for Molecular Dynamics generated ensembles of conformation for (a) ordered and (b) disordered regions of partially disordered proteins (1CD3, 1F0R and 1MVF).

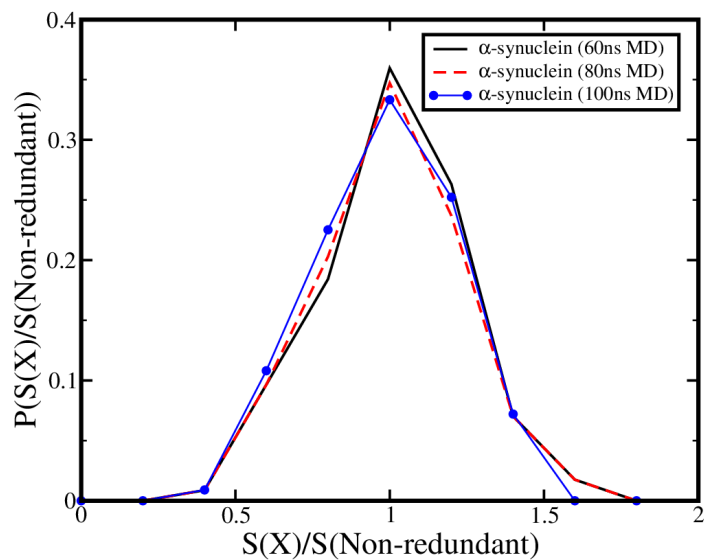

**Supplementary Figure S9.** Conformational entropy calculated using triads relative to non-redundant database for Molecular Dynamics generated ensembles of conformation for  $\alpha$ -synuclein.

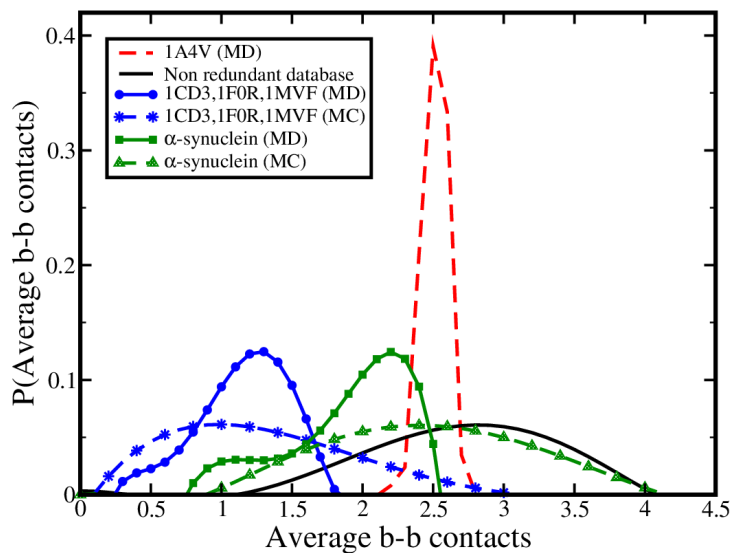

**Supplementary Figure S10.** Distribution of average native contacts.

**Supplementary Table S1.** Selected proteins for MD and MC simulations.

| Protein                    | PDB ID | Ordered<br>/Disordered   | Disordered Residues<br>(Total Residues) | Structure                                                                               |
|----------------------------|--------|--------------------------|-----------------------------------------|-----------------------------------------------------------------------------------------|
| $\alpha$ -lactalbumin      | 1A4V   | Ordered                  | — (123)                                 | Extracted from RCSB                                                                     |
| Scaffolding<br>Protein GPB | 1CD3   | Partially<br>Disordered  | 9-60 (120)                              | Initial template is extracted<br>from RCSB. Disordered region<br>is modeled by MODELLER |
| PemI-like<br>Protein       | 1MVF   | Partially<br>Disordered  | 1-3, 48-82 (82)                         | Initial template is extracted<br>from RCSB. Disordered region<br>is modeled by MODELLER |
| Human<br>Factor Xa         | 1F0R   | Partially<br>Disordered  | 1-82 (134)                              | Initial template is extracted<br>from RCSB. Disordered region<br>is modeled by MODELLER |
| $\alpha$ -synuclein        | —      | Completely<br>Disordered | 1-140 (140)                             | Complete protein is modeled<br>by MODELLER                                              |

**Supplementary Table S2.** Relative entropy  
 $(= (S(X_1X_2X_3) - S(X_1GX_3)) / S(X_1GX_3))$  of triads  $(X_1X_2X_3)$  w.r.t  
 $X_1GX_3$  where entropy of a specific triad is found to be higher than the  
entropy of  $X_1GX_3$ .

| Triads | Relative Entropy<br>w.r.t $X_1GX_3$ | Confidence<br>Interval | Triads | Relative Entropy<br>w.r.t $X_1GX_3$ | Confidence<br>Interval |
|--------|-------------------------------------|------------------------|--------|-------------------------------------|------------------------|
| WVM    | 0.48                                | 0.157                  | WLM    | 0.33                                | 0.278                  |
| HLM    | 0.31                                | 0.012                  | HSM    | 0.28                                | 0.013                  |
| WDM    | 0.25                                | 0.282                  | PNC    | 0.24                                | 0.011                  |
| HHM    | 0.24                                | 0.021                  | HVM    | 0.23                                | 0.012                  |
| HHH    | 0.23                                | 0.005                  | DDK    | 0.21                                | 0.004                  |
| DNK    | 0.21                                | 0.004                  | PLC    | 0.21                                | 0.012                  |
| NNR    | 0.20                                | 0.005                  | PIC    | 0.17                                | 0.011                  |
| DKK    | 0.16                                | 0.003                  | TNC    | 0.16                                | 0.012                  |
| PKC    | 0.16                                | 0.011                  | TEC    | 0.16                                | 0.011                  |
| FEW    | 0.16                                | 0.008                  | NNK    | 0.15                                | 0.004                  |
| NNQ    | 0.15                                | 0.004                  | NDK    | 0.15                                | 0.004                  |
| NDR    | 0.14                                | 0.004                  | PDC    | 0.14                                | 0.011                  |
| DNH    | 0.14                                | 0.005                  | DYK    | 0.14                                | 0.004                  |
| DNT    | 0.14                                | 0.003                  | NNV    | 0.13                                | 0.003                  |
| DFT    | 0.13                                | 0.003                  | DFS    | 0.13                                | 0.003                  |
| DNS    | 0.12                                | 0.003                  | NDV    | 0.12                                | 0.004                  |
| FDW    | 0.12                                | 0.009                  | TAC    | 0.12                                | 0.009                  |
| MDG    | 0.12                                | 0.005                  | DFK    | 0.12                                | 0.003                  |
| FAW    | 0.12                                | 0.008                  | PFD    | 0.11                                | 0.004                  |
| NLH    | 0.11                                | 0.006                  | PVC    | 0.11                                | 0.011                  |
| NSR    | 0.11                                | 0.005                  | CSL    | 0.10                                | 0.006                  |
| DKS    | 0.10                                | 0.003                  | DDT    | 0.10                                | 0.003                  |
| DYS    | 0.10                                | 0.003                  | NTK    | 0.10                                | 0.004                  |
| DSK    | 0.10                                | 0.003                  | DDW    | 0.10                                | 0.005                  |
| FSW    | 0.10                                | 0.008                  | DSS    | 0.09                                | 0.003                  |
| WLH    | 0.09                                | 0.008                  | FNW    | 0.09                                | 0.009                  |
| DTT    | 0.09                                | 0.003                  | NYK    | 0.09                                | 0.004                  |
| DIS    | 0.09                                | 0.003                  | PLD    | 0.09                                | 0.003                  |
| DRS    | 0.08                                | 0.003                  | CDI    | 0.08                                | 0.005                  |
| DYT    | 0.08                                | 0.003                  | MNR    | 0.08                                | 0.007                  |
| DLK    | 0.08                                | 0.003                  | HDM    | 0.08                                | 0.011                  |
| LSC    | 0.08                                | 0.005                  | FDC    | 0.08                                | 0.007                  |
| DNQ    | 0.08                                | 0.004                  | WDI    | 0.08                                | 0.006                  |
| DNR    | 0.08                                | 0.004                  | HDY    | 0.08                                | 0.006                  |
| CDL    | 0.07                                | 0.005                  | TVC    | 0.07                                | 0.010                  |

| Triads | Relative Entropy<br>w.r.t $X_1GX_3$ | Confidence<br>Interval | Triads | Relative Entropy<br>w.r.t $X_1GX_3$ | Confidence<br>Interval |
|--------|-------------------------------------|------------------------|--------|-------------------------------------|------------------------|
| PAC    | 0.07                                | 0.011                  | VDM    | 0.07                                | 0.004                  |
| DLT    | 0.07                                | 0.003                  | CLP    | 0.07                                | 0.008                  |
| ENQ    | 0.07                                | 0.004                  | DST    | 0.07                                | 0.003                  |
| NSK    | 0.07                                | 0.004                  | TSC    | 0.07                                | 0.010                  |
| DDR    | 0.06                                | 0.004                  | DIT    | 0.06                                | 0.003                  |
| PNE    | 0.06                                | 0.003                  | DYH    | 0.06                                | 0.005                  |
| NLR    | 0.06                                | 0.004                  | NSV    | 0.06                                | 0.003                  |
| TKC    | 0.06                                | 0.013                  | RRC    | 0.06                                | 0.008                  |
| MDY    | 0.06                                | 0.006                  | DTQ    | 0.06                                | 0.004                  |
| CDC    | 0.06                                | 0.035                  | NFK    | 0.06                                | 0.004                  |
| MNG    | 0.06                                | 0.005                  | NFR    | 0.05                                | 0.004                  |
| NNE    | 0.05                                | 0.004                  | NKK    | 0.05                                | 0.004                  |
| DVS    | 0.05                                | 0.003                  | DDS    | 0.05                                | 0.003                  |
| DAT    | 0.05                                | 0.003                  | MDI    | 0.05                                | 0.005                  |
| NRV    | 0.05                                | 0.003                  | PVD    | 0.05                                | 0.003                  |
| DHR    | 0.05                                | 0.004                  | NSQ    | 0.04                                | 0.004                  |
| PFE    | 0.04                                | 0.003                  | DDQ    | 0.04                                | 0.004                  |
| DLH    | 0.04                                | 0.004                  | DQT    | 0.04                                | 0.004                  |
| NLK    | 0.04                                | 0.003                  | NNH    | 0.04                                | 0.006                  |
| PNF    | 0.04                                | 0.003                  | DAS    | 0.04                                | 0.003                  |
| NSM    | 0.04                                | 0.006                  | KNK    | 0.04                                | 0.002                  |
| NKV    | 0.04                                | 0.003                  | NRR    | 0.04                                | 0.004                  |
| DIK    | 0.04                                | 0.003                  | NFH    | 0.04                                | 0.006                  |
| NDN    | 0.04                                | 0.004                  | DTK    | 0.04                                | 0.003                  |
| DVT    | 0.04                                | 0.003                  | DNW    | 0.04                                | 0.004                  |
| MSF    | 0.04                                | 0.006                  | HFM    | 0.04                                | 0.018                  |
| MDE    | 0.04                                | 0.006                  | CSC    | 0.04                                | 0.036                  |
| EDK    | 0.04                                | 0.003                  | NYH    | 0.04                                | 0.006                  |
| DQK    | 0.04                                | 0.004                  | PTD    | 0.03                                | 0.004                  |
| DFR    | 0.03                                | 0.004                  | DVK    | 0.03                                | 0.003                  |
| MAG    | 0.03                                | 0.005                  | PYE    | 0.03                                | 0.003                  |
| PND    | 0.03                                | 0.004                  | DSH    | 0.03                                | 0.005                  |
| HAM    | 0.03                                | 0.011                  | MQG    | 0.03                                | 0.004                  |
| DKT    | 0.03                                | 0.003                  | PNV    | 0.03                                | 0.003                  |
| DAH    | 0.03                                | 0.005                  | SNK    | 0.03                                | 0.002                  |
| MRG    | 0.03                                | 0.005                  | PNA    | 0.03                                | 0.003                  |

| Triads | Relative Entropy<br>w.r.t $X_1GX_3$ | Confidence<br>Interval | Triads | Relative Entropy<br>w.r.t $X_1GX_3$ | Confidence<br>Interval |
|--------|-------------------------------------|------------------------|--------|-------------------------------------|------------------------|
| MNI    | 0.02                                | 0.005                  | DHK    | 0.02                                | 0.004                  |
| PTC    | 0.02                                | 0.016                  | PDD    | 0.02                                | 0.004                  |
| DCS    | 0.02                                | 0.004                  | NYR    | 0.02                                | 0.005                  |
| DTC    | 0.02                                | 0.007                  | NTR    | 0.02                                | 0.004                  |
| DVR    | 0.02                                | 0.003                  | TNK    | 0.02                                | 0.003                  |
| DWK    | 0.02                                | 0.004                  | ENV    | 0.02                                | 0.002                  |
| DLS    | 0.02                                | 0.003                  | CDP    | 0.02                                | 0.008                  |
| MDF    | 0.02                                | 0.006                  | QNV    | 0.02                                | 0.003                  |
| SHM    | 0.02                                | 0.005                  | DHS    | 0.02                                | 0.004                  |
| LDI    | 0.02                                | 0.002                  | NLQ    | 0.02                                | 0.004                  |
| GNM    | 0.01                                | 0.004                  | CHT    | 0.01                                | 0.007                  |
| HYY    | 0.01                                | 0.006                  | PID    | 0.01                                | 0.004                  |
| PYD    | 0.01                                | 0.004                  | NKQ    | 0.01                                | 0.004                  |
| NAH    | 0.01                                | 0.006                  | PDT    | 0.01                                | 0.003                  |
| DRR    | 0.01                                | 0.004                  | KNE    | 0.01                                | 0.003                  |
| NRH    | 0.01                                | 0.006                  | DRK    | 0.01                                | 0.004                  |
| CSR    | 0.01                                | 0.007                  | DTS    | 0.01                                | 0.003                  |
| ENK    | 0.01                                | 0.003                  | NRK    | 0.01                                | 0.004                  |
| MLG    | 0.01                                | 0.004                  | DVC    | 0.01                                | 0.005                  |
| NIC    | 0.01                                | 0.007                  | HNY    | 0.01                                | 0.006                  |
| YSM    | 0.01                                | 0.006                  | NDQ    | 0.01                                | 0.004                  |
| DYN    | 0.01                                | 0.003                  | NNT    | 0.01                                | 0.003                  |
| MDK    | 0.01                                | 0.005                  |        |                                     |                        |

**Supplementary Table S3.** Relative entropy  
 $(= (S(X_1X_2X_3) - S(X_1GX_3)) / S(X_1GX_3))$  of triads  $(X_1X_2X_3)$  which are  
least entropic (top 100 triads) w.r.t  $X_1GX_3$ .

| Triads | Relative Entropy<br>w.r.t $X_1GX_3$ | Confidence<br>Interval | Triads | Relative Entropy<br>w.r.t $X_1GX_3$ | Confidence<br>Interval |
|--------|-------------------------------------|------------------------|--------|-------------------------------------|------------------------|
| HEC    | -0.93                               | 0.015                  | WCL    | -0.93                               | 0.010                  |
| IWM    | -0.93                               | 0.009                  | HMC    | -0.93                               | 0.015                  |
| MEC    | -0.93                               | 0.015                  | NMC    | -0.93                               | 0.012                  |
| QCD    | -0.93                               | 0.008                  | KMW    | -0.93                               | 0.009                  |
| CPW    | -0.93                               | 0.014                  | MRW    | -0.94                               | 0.012                  |
| WYC    | -0.94                               | 0.051                  | QCY    | -0.94                               | 0.008                  |
| WNW    | -0.94                               | 0.012                  | NCC    | -0.94                               | 0.012                  |
| CMP    | -0.94                               | 0.012                  | WCF    | -0.94                               | 0.011                  |
| CYP    | -0.94                               | 0.011                  | FCW    | -0.94                               | 0.011                  |
| KMC    | -0.94                               | 0.010                  | MCQ    | -0.94                               | 0.011                  |
| WMI    | -0.95                               | 0.010                  | WFC    | -0.95                               | 0.036                  |
| CWK    | -0.95                               | 0.009                  | FCC    | -0.95                               | 0.010                  |
| MWI    | -0.95                               | 0.010                  | NWM    | -0.95                               | 0.010                  |
| CCK    | -0.95                               | 0.010                  | MWR    | -0.95                               | 0.010                  |
| MWG    | -0.95                               | 0.009                  | SCM    | -0.95                               | 0.010                  |
| KCM    | -0.95                               | 0.007                  | WCQ    | -0.95                               | 0.009                  |
| NCW    | -0.95                               | 0.009                  | ICW    | -0.95                               | 0.009                  |
| CWE    | -0.96                               | 0.008                  | CMK    | -0.96                               | 0.008                  |
| WWP    | -0.96                               | 0.009                  | SCN    | -0.96                               | 0.008                  |
| EMW    | -0.96                               | 0.008                  | FCM    | -0.96                               | 0.008                  |
| MCT    | -0.96                               | 0.008                  | MHM    | -0.96                               | 0.008                  |
| LMC    | -0.96                               | 0.008                  | TCW    | -0.96                               | 0.008                  |
| SMC    | -0.96                               | 0.008                  | CDH    | -0.96                               | 0.008                  |
| CMG    | -0.96                               | 0.008                  | GMC    | -0.96                               | 0.007                  |
| WEC    | -0.96                               | 0.033                  | WTC    | -0.97                               | 0.036                  |
| WCY    | -0.97                               | 0.006                  | RMW    | -0.97                               | 0.006                  |
| MCF    | -0.97                               | 0.006                  | MQC    | -0.97                               | 0.011                  |
| PWC    | -0.97                               | 0.009                  | WHW    | -0.97                               | 0.009                  |
| WLC    | -0.97                               | 0.029                  | CTM    | -0.97                               | 0.010                  |
| FMM    | -0.97                               | 0.005                  | HPC    | -0.97                               | 0.009                  |
| WSC    | -0.97                               | 0.030                  | CDW    | -0.97                               | 0.008                  |
| MWE    | -0.98                               | 0.005                  | FMC    | -0.98                               | 0.007                  |
| WAW    | -0.98                               | 0.007                  | CPM    | -0.98                               | 0.008                  |
| MCY    | -0.98                               | 0.007                  | HWM    | -0.98                               | 0.008                  |
| HKC    | -0.98                               | 0.008                  | MIM    | -0.98                               | 0.006                  |
| MPW    | -0.98                               | 0.006                  | CEW    | -0.98                               | 0.007                  |

| Triads | Relative Entropy<br>w.r.t $X_1GX_3$ | Confidence<br>Interval | Triads | Relative Entropy<br>w.r.t $X_1GX_3$ | Confidence<br>Interval |
|--------|-------------------------------------|------------------------|--------|-------------------------------------|------------------------|
| CMQ    | -0.98                               | 0.006                  | WCH    | -0.98                               | 0.006                  |
| CCQ    | -0.98                               | 0.006                  | CTC    | -0.98                               | 0.012                  |
| MCV    | -0.98                               | 0.005                  | PWW    | -0.98                               | 0.005                  |
| WWA    | -0.98                               | 0.005                  | CMY    | -0.99                               | 0.005                  |
| QMW    | -0.99                               | 0.005                  | CWG    | -0.99                               | 0.005                  |
| CWT    | -0.99                               | 0.004                  | MWP    | -0.99                               | 0.005                  |
| WCE    | -0.99                               | 0.004                  | SWC    | -0.99                               | 0.005                  |
| WMY    | -0.99                               | 0.004                  | YYC    | -0.99                               | 0.004                  |
| MWA    | -0.99                               | 0.004                  | CCM    | -0.99                               | 0.006                  |
| PCH    | -0.99                               | 0.003                  | YCH    | -0.99                               | 0.003                  |
| CHM    | -0.99                               | 0.005                  | TCC    | -0.99                               | 0.004                  |
| WPW    | -0.99                               | 0.004                  | CYW    | -0.99                               | 0.004                  |
| MPM    | -0.99                               | 0.003                  | CKC    | -0.99                               | 0.007                  |
| KCC    | -0.99                               | 0.003                  | CMM    | -0.99                               | 0.004                  |



### **PDB IDs of 1917 Globular Proteins:**

2DY7A, 4A5VA, 1BR0A, 2H2MA, 1GH9A, 2L52A, 3HVVA, 1JO6A, 2RQ5A, 2BZTA, 2KVL A, 2DGYA, 3C12A, 1DHNA, 2LS01, 2KMVA, 2LAVA, 1HE9A, 1ICXA, 2IWCA, 1JLNA, 3FS5A, 2EYIA, 2KXFA, 2W0IA, 2KNAA, 2OJ4A, 2CQWA, 2EZLA, 2KYWA, 2M2DA, 2JSPA, 3MZZA, 1GTAA, 1WOTA, 1IRLA, 2KAFA, 2LSEA, 2D1UA, 2PP4A, 1BYWA, 2HWTA, 1JW3A, 2W0NA, 2B0AA, 2JMLA, 1H7DA, 1M9GA, 2SILA, 1ABZA, 2KO6A, 2K0SA, 2JA4A, 1BKBA, 2E6JA, 1ZITA, 2YVNA, 1D6BA, 1K42A, 1L3YA, 1BW3A, 2LC2A, 1WFOA, 2K07A, 2DI0A, 2BO5A, 2IF1A, 2DZLA, 2DN8A, 1QJ9A, 2L9QA, 1ZHVA, 1YDUA, 1TH5A, 2DGZA, 2ROVA, 2LNAA, 1NGLA, 1IFGA, 2EDUA, 2NS5A, 1WMTA, 1Z33A, 1TZQA, 1UB9A, 2FYJA, 1IRZA, 2L9MA, 1A8OA, 1ZLBA, 2LRUA, 2JY9A, 2LTUA, 1SS6A, 1EXGA, 1J7GA, 1WHQA, 1L1PA, 1WXPA, 2KY9A, 1B64A, 2E00A, 1RLFA, 2JMSA, 1VDLA, 1K40A, 2E6ZA, 1TM9A, 2L7SA, 6XIAA, 1VD0A, 1T0GA, 2L0RA, 4BHCA, 1EDGA, 3APPA, 2EKHA, 1CX1A, 1YQ8A, 2VXDA, 2K0NA, 2A55A, 1IFPA, 1TAPA, 2KLUA, 1YT4A, 1GP8A, 1UGLA, 1BNOA, 2KRXA, 1R3BA, 2KMLA, 1X1FA, 3B02A, 1G8AA, 2EAOA, 2HTJA, 1P1DA, 2C0WA, 1AHCA, 2J4MA, 2KVPA, 1XRDA, 2DAFA, 1OVQA, 2JQXA, 1CDBA, 2YWXA, 1YZSA, 2JR0A, 1OLRA, 1UQVA, 2KCWA, 1LPLA, 2CRLA, 2LU3A, 1ALDA, 2LONA, 1QJTA, 2M3KA, 1U3NA, 2LBOA, 1DUJA, 2LC3A, 4DOMA, 2OYZA, 1BIPA, 2KA0A, 2L8OA, 2KRKA, 2KW7A, 2CQUA, 1EQ1A, 2FQHA, 3IHOA, 2KIAA, 1BRZA, 3V5BA, 2LEMA, 2D9ZA, 1JWEA, 2KXSA, 1KVPA, 1J57A, 2D8MA, 2DW3A, 2LXFA, 1CEMA, 2YSEA, 2KNJA, 1GJSA, 3FH2A, 3MXXA, 2DBCA, 1KUUA, 1TGOA, 1WH0A, 2AH5A, 2LQKA, 1Y2YA, 2V0FA, 1TQZA, 1QR9A, 2RA1A, 1FTSA, 3D4MA, 4E5RA, 1V49A, 1JXCA, 2LTLA, 2LNTA, 1Q50A, 2KONA, 2K3PA, 1HKGA, 1DTZA, 2KXYA, 1DVOA, 2WCYA, 2LJPA, 2L4WA, 1DDFA, 2V14A, 1WJ4A, 2BIDA, 2EDMA, 1WFMA, 1POUA, 1H8MA, 2KUMA, 2K0MA, 1Y7XA, 2PETA, 1YWXA, 2KSWA, 1DROA, 1QQFA, 3AAPA, 1L2PA, 2KMGA, 1UAPA, 2M5OA, 1OJQA, 2JXTA, 3LD1A, 1BD8A, 2JO1A, 2KMFA, 1N5HA, 2KCKA, 1SXMA, 1X58A, 1Q48A, 1C2AA, 1FQQA, 2YU3A, 2E5EA, 1G6EA, 1USSA, 3JV1A, 1VFIA, 2K88A, 2K2EA, 1NEQA, 1ZTSA, 2B68A, 2LCUA, 2OF3A, 2KBZA, 1F7WA, 1H09A, 2L0KA, 1T4YA, 2CTXA, 2XV9A, 1FUSA, 1X3AA, 2CR9A, 1C3GA, 2K3AA, 2M09A, 1Q1OA, 2EQNA, 1K8HA, 2YUIA, 1PLRA, 1EYHA, 3VPYA, 1ZRXA, 1BU2A, 2M4FA, 2LXNA, 2JNSA, 1C3YA, 2RRUA, 1ZLGA, 2ADZA, 4DNUA, 1EZAA, 1X4PA, 2XXSA, 1SG5A, 1WS6A, 3PG4A, 2LFPA, 1BEOA, 1DQCA, 2KMZA, 1P4SA, 2Z9TA, 2JVJA, 1D2PA, 4B50A, 1P3CA, 2KZ4A, 1HA8A, 4FCUA, 1W9RA, 1NYOA, 1KV4A, 2L82A, 3E9UA, 2E3EA, 2K75A, 2KGS A, 1OH1A, 2YSZA, 1WJ5A, 1PBUA, 1PMDA, 2JOQA, 2EDOA, 1WISA, 2KPTA, 2L06A, 2GQCA, 1POQA, 2AYYA, 2KMUA, 2KCOA, 1R5SA, 2JTCA, 1H6TA, 2KHVA, 1V5MA, 2LG1A, 1AD6A, 2BNHA, 3IV4A, 2AC4A, 2YUYA, 1J8SA, 1DQ0A, 2VU5A, 1ZLMA, 2R0SA, 2KWHA,

1D8BA, 1MM4A, 1BSYA, 2KRUA, 2JR3A, 1EO1A, 2J5OA, 4GLPA, 3FK5A, 2HO9A, 2LNLA, 2I85A, 3RZYA, 2CRQA, 2LLZA, 1VGJA, 1WLMA, 2L60A, 2CR4A, 3N4UA, 1NI5A, 2A2PA, 2ZGKA, 2PTHA, 2DYIA, 1H5OA, 2L76A, 2L2QA, 1HS7A, 1NG6A, 1V5TA, 3JZZA, 2CQJA, 2RPBA, 1DE3A, 2G31A, 4K14A, 2KUBA, 1XSAA, 1UFMA, 1JEJA, 2KHKA, 2IKEA, 1TTYA, 1RTCA, 1UCSA, 2CUJA, 1XDWA, 2KZXA, 1P6RA, 2L8YA, 2K8QA, 1ZEQX, 1XUTA, 2CSPA, 1CIXA, 2QHTA, 2LPEA, 2KZ9A, 2K3GA, 1ZK9A, 2EE0A, 2LCDA, 2GE4A, 2FFTA, 2LF2A, 1UTGA, 2KJ6A, 2JUBA, 2NEFA, 1WGRA, 2KNGA, 2JO7A, 2KSYA, 1MUFA, 1P9CA, 2JT3A, 2KK9A, 2JTMA, 2LWFA, 2AI6A, 2C08A, 3IPZA, 2LYIA, 1ERCA, 1CWXA, 2K3NA, 2KTAA, 2DO9A, 2VIKA, 2JR1A, 1VSMA, 1EDQA, 2AHNA, 1DABA, 2DB1A, 1WHBA, 2K1SA, 2KVVA, 2PFUA, 2DKSA, 2JWPA, 1EHDA, 2LFIA, 1GXIE, 1CRZA, 1PFJA, 2WGNB, 2W9OA, 2DLLA, 2GFUA, 1A91A, 1UEOA, 2KQUA, 2M4MA, 3EZMA, 1VPUA, 2LOEA, 2YZTA, 2RRFA, 2BAFA, 2DMWA, 1RCBA, 2LQXA, 3UAFA, 3QPAA, 2BVVA, 1V60A, 1E6MA, 2EJEA, 2LSMA, 1G2HA, 2RRNA, 2E34A, 3CH7A, 2W9QA, 2RQRA, 2FRGP, 2L4AA, 2KE4A, 2H3KA, 2K9SA, 3CRDA, 1B8WA, 1SS1A, 2LBCA, 2H0MA, 4GIFA, 1YWYA, 2LUUA, 1WVKA, 4FEIA, 2JRYA, 2LRAA, 1WH9A, 3FHFA, 2J8PA, 1Z4HA, 2YRUA, 2OA4A, 2QEVA, 2LE3A, 1X0MA, 2JUOA, 1UGOA, 2GGOA, 1AG4A, 2GO9A, 2IEMA, 2LVLA, 1HOEA, 1Z2QA, 2KD2A, 2KFWA, 2KBQA, 1D4BA, 1GWPA, 2OV6A, 1AB3A, 2KMWA, 2M0AA, 2IGDA, 2DO5A, 2KISA, 1PQNA, 1JAJA, 2KSGA, 2LMKA, 2CQLA, 1SRVA, 1KS6A, 2HX6A, 1Q0VA, 2CQ7A, 1WPJA, 2JX5A, 2LNBA, 2JYNA, 3BWTA, 1BV8A, 1M12A, 2LZ0A, 2KUTA, 1SSNA, 2M4LA, 2KL7A, 3ACPA, 1ESRA, 1RZSA, 2K32A, 2LFKA, 2LKYA, 2P0PA, 2KBBA, 2IVWA, 2TGIA, 1YHPA, 1WT7A, 2FUJA, 1JDQA, 2KTLA, 1T1DA, 1L2MA, 2LGTA, 2P52A, 1HX2A, 1WWQA, 2M5ZA, 2A3DA, 1BT9A, 1Z1MA, 1TPMA, 2HC5A, 1VLSA, 1O8RA, 2L6OA, 1CEWI, 2E62A, 1WH5A, 2RQ8A, 1ADXA, 2LAIA, 1R6HA, 1UX5A, 1L8FA, 3KVDD, 2EH0A, 2LJ2A, 1LWRA, 1H5PA, 1W2QA, 2F82A, 2LLGA, 2ROOA, 2DK3A, 1Z9IA, 1WF6A, 2E2FA, 2Q98A, 2IFOA, 2KL8A, 2CSOA, 2RMJA, 2K8YA, 1MO7A, 1K0FA, 2LIYA, 2Y0RX, 2O0I1, 1DGUA, 1FPSA, 1QAUA, 2JM2A, 1HYKA, 2JSOA, 2D35A, 2K4VA, 1ILOA, 1GPSA, 1BEDA, 4PTIA, 2Q6ZA, 3ZUAA, 2LAHA, 3H6JA, 1RESA, 1JT8A, 2LM0A, 2PLCA, 2ENJA, 2KN1A, 1PCPA, 1BZ4A, 1UG2A, 1ZGGA, 1F4IA, 2P6JA, 2DOFA, 1F6VA, 1GA3A, 2L0CA, 2CW4A, 1KKGA, 2B8IA, 1YZFA, 1TBDA, 2L8AA, 2I6VA, 1KOYA, 1WKTA, 2I3EA, 1CIIA, 1HICA, 2KXIA, 1L5CA, 2KT7A, 2PNDA, 1CZ1A, 1EQ7A, 1RKMA, 2YZ0A, 2K37A, 2LQJA, 2M3DA, 1KLOA, 1WJ6A, 1DIXA, 1ND7A, 1Q1VA, 2GYTA, 1P9KA, 1UGJA, 1YUAA, 2GDTA, 2KCDA, 1K0SA, 3KTTB, 2DJVA, 2LA3A, 1H9EA, 1KF5A, 2COBA, 2JRKA, 2KS6A, 2EKFA, 1SOUA, 1C8PA, 1P7SA, 2GAQA, 1X53A, 2JZ2A, 1UG1A, 2KMCA, 1JHSA, 2LHRA, 1DVCA, 2LC0A, 1UH6A, 1BM8A, 3V1AA, 2L1NA, 2RR7A, 2KBFA, 2JONA, 2KD7A, 1X3QA, 1WLXA, 1WLOA,

1DUSA, 2KRTA, 1B1AA, 2AIVA, 4F91B, 1JJGA, 3M70A, 1IQOA, 3RDJA, 2X8XX, 2GO0A, 1OF9A, 1S79A, 1WFIA, 2L91A, 2LT2A, 1UTAA, 2K4MA, 2EEFA, 1OOIX, 2L8DA, 2LKLA, 1P68A, 1ZO0A, 1N7OA, 2KQ5A, 2E7GA, 2L7JA, 2HGKA, 2JQAA, 2DNXA, 2GKTI, 2KF2A, 2KVOA, 2D3JA, 1CQYA, 1POZA, 1CBGA, 2DK4A, 1ITPA, 1QTFA, 1D8JA, 2PIIA, 2FD5A, 2HHIA, 1UJLA, 2FCDA, 1C05A, 2JV0A, 1R73A, 2YUFA, 2JXUA, 1KG1A, 2EBIA, 1HK6A, 2X9ZA, 2CTKA, 1OCPA, 2L8BA, 2L03A, 3RJPA, 1K1VA, 2JOEA, 2HDEA, 2KSLA, 2JNZA, 2LNJA, 1U97A, 1I35A, 3CBHA, 2KI8A, 2M1ZA, 2JSWA, 2M7OA, 1TUZA, 1QU5A, 2L6AA, 2CPRA, 1SCZA, 1XSFA, 2Y9TA, 3TOWA, 1O8MA, 1XQ8A, 2KDOA, 1WWYA, 2EE7A, 1DIVA, 1SZLA, 1J2MA, 2L37A, 2L2DA, 2ORCA, 1QU6A, 2DO3A, 2LT8A, 3G4PA, 2L7KA, 1Q2YA, 2NSCA, 2KJFA, 1PSYA, 2DIWA, 2GUTA, 1V05A, 1TOZA, 2LENA, 1CM3A, 1QL1A, 2B4NA, 1JJRA, 3GV3A, 1WJNA, 2LGNA, 2H7AA, 2JN6A, 1N4CA, 1XGDA, 1HN6A, 2LM4A, 3S0AA, 2KYZA, 2WGOA, 1JVRA, 2KWZA, 2LNVA, 2BK8A, 2DHXA, 1EIWA, 1A5JA, 1I5PA, 2KN8A, 1Y5OA, 2LSYA, 2DP5A, 2A6ZA, 3ND2A, 2KPQA, 1F2HA, 1GBSA, 2LUQA, 2E8FA, 2L3LA, 1WFQA, 2CQYA, 2CQ8A, 2JS4A, 2LXRA, 2AZPA, 2KY6A, 1P7NA, 1G84A, 2HF6A, 1WI9A, 1WJJA, 2BZMA, 2LCLA, 1BB8A, 2K36A, 2YXPX, 1IV8A, 1Z8MA, 2JQVA, 2KCZA, 1SSLA, 2J5HA, 1X3UA, 1HY9A, 2K54A, 3ENUA, 2JPUA, 1FSFA, 2DAEA, 2C6UA, 1EMRA, 2GLWA, 1CMOA, 1X9BA, 2L9FA, 2LVGA, 1RQ6A, 2DY8A, 2COKA, 1C93A, 1ILYA, 2ENKA, 2KREA, 1YBJA, 2DP9A, 1BETA, 1IJBA, 2VXEA, 1UG4A, 1JI8A, 2KZRA, 1BHUA, 1RMJA, 1NR3A, 2H2ZA, 1USGA, 3RFFA, 2CYGA, 2YUSA, 2OUTA, 2DBAA, 1V95A, 2P3MA, 2AFDA, 1WFRA, 1HN3A, 2K86A, 2DALA, 2GQBA, 2DNYA, 1CDZA, 2P30A, 1BY1A, 1ARLA, 1ILKA, 2L1IA, 1SR2A, 2KR6A, 2KGLA, 1WI0A, 1WJWA, 2JQGR, 2JSXA, 1AAJA, 1VEEA, 2RNGA, 3OZHA, 2K87A, 2JTVA, 2DAJA, 2KIGA, 2DO7A, 2LQUA, 1QQHA, 1DP3A, 1FSBA, 1MYNA, 2LVSA, 1QA5A, 1JRMA, 1WJ7A, 1QCXA, 1JBIA, 1F94A, 1H2PP, 2LQ7A, 3TUAA, 2AGAA, 2KL5A, 1XS8A, 4A4DA, 1T23A, 2KC6A, 2KK0A, 3CSRA, 1APQA, 1F00I, 1P1LA, 1WP5A, 2KKJA, 2KBIA, 3BN6A, 2OV1A, 2LDKA, 1JLIA, 2KCAA, 1GYDB, 1KVNA, 2EE2A, 2YRBA, 1Z2FA, 2CQMA, 2K89A, 2LAAA, 2P01A, 1UCUA, 2RN7A, 2BW2A, 1V65A, 1HH2P, 2LN8A, 1O8TA, 1VD2A, 1K89A, 1QO6A, 1R6EA, 2K9MA, 1PXUA, 2L3BA, 3PTJA, 2CH0A, 1AB7A, 1PQXA, 1AHLA, 1TNSA, 1N87A, 2DB2A, 2JX4A, 3KT9A, 3ILSA, 3TIPA, 1TQGA, 1H9FA, 1WK0A, 2LG4A, 1GHHA, 1U89A, 2K9PA, 1KSQA, 2HLQA, 1ENHA, 1DZ7A, 2K6HA, 2H8EA, 1Y2QA, 2JW5A, 1H6QA, 2L5CA, 3ZG4A, 2LOTA, 2K4QA, 2IE8A, 2O4EA, 2JXPA, 1EJGA, 2KFPA, 1ZZAA, 2JUJA, 1EW3A, 1V32A, 1BYIA, 3LJ8A, 2KZWA, 2LH9A, 2KESA, 2KJVA, 1L1IA, 1FAFA, 2GT5A, 2EO2A, 1NKLA, 1KJUA, 2FBOJ, 2KJGA, 2L6QA, 1F53A, 1GJXA, 2K5HA, 1Q80A, 2L0DA, 2KW5A, 1S29A, 2KZ8A, 2L3NA, 2K2OA, 2KL4A, 2KJYA, 2NWDX, 2ITHA, 1J0SA, 2LW6A, 1GH8A, 1WYJA, 2LFVA,

2LORA, 2DMEA, 2JZFA, 1G03A, 2KZSA, 2G0UA, 2BAAA, 2KSVA, 2A4HA, 1CDHA, 1YWLA, 2KSFA, 2RM5A, 2M4GA, 3F9VA, 2LPDA, 1WINA, 1EMWA, 2COOA, 2RSOA, 2F3IA, 2LYCA, 1SLLA, 2YUGA, 2DA6A, 2K18A, 2LLMA, 2LF6A, 2KPYA, 1GLNA, 1I2UA, 2JN9A, 1FYBA, 2JSFA, 1ANUA, 1XIXA, 1PNEA, 2FMRA, 2FCBA, 1K5KA, 2CU1A, 2GPQA, 2JQ3A, 4AKAA, 2JZ4A, 1CFIA, 2LEQA, 2LMZA, 2KOUA, 2KB9A, 2LIOA, 1PWKA, 1XEEA, 1X67A, 1N7LA, 2LLNA, 2L1SA, 3KJEA, 1GO9A, 2KKXA, 2BYEA, 1DT4A, 1LL8A, 2RSGA, 2V6CA, 2YQKA, 2L3UA, 2CJNA, 3A7LA, 3UCIA, 1YXEA, 2EZIA, 2KVSA, 1ZXFA, 2JTOA, 1SURA, 2L25A, 2LPIA, 2KPMA, 2K5GA, 1WRGA, 2K3DA, 2K8OA, 1CWYA, 2KUA, 1G7EA, 1WCLA, 1X1EA, 1I6ZA, 1MN3A, 2AGMA, 1FEXA, 2KEPA, 1MD6A, 1RW2A, 2M26A, 2LLVA, 2ROQA, 1DV5A, 2HEQA, 2K2BA, 1SKFA, 1D3LA, 2FJ6A, 1NE3A, 1TVMA, 2BICA, 2LGZA, 3SH4A, 2D56A, 2KYA, 1PMRA, 2KWAA, 1AK6A, 2CWYA, 2E0GA, 2PXGA, 1R4GA, 1GGVA, 1FASA, 1JCUA, 1P6TA, 2L7WA, 2CRFA, 1GOKA, 3RA2A, 2KK7A, 2LR4A, 2L8KA, 1HNRA, 1ZC1A, 1OGWA, 2IMUA, 2AXLA, 2KCNA, 2KYHA, 1QZMA, 1G7OA, 2K5IA, 2KVTA, 2KHEA, 1LWBA, 1XPNA, 2KLBA, 1N81A, 2DKZA, 2LRGA, 2L2EA, 1ND9A, 1WG7A, 1WH8A, 1HP8A, 4A02A, 2JWYA, 2GMGA, 1BUYA, 2K4KA, 2K3IA, 1WHNA, 1WQKA, 2KPPA, 1YR1A, 2HNA, 1HDLA, 2YS4A, 2QU4A, 2L57A, 1PVEA, 1HKYA, 1DTVA, 1IO2A, 1IB8A, 2KJRA, 2KW8A, 2RQYA, 1AUZA, 2JHBA, 1V2YA, 2KZ5A, 2JPNA, 1I1SA, 2SNVA, 1MF7A, 2KE3A, 1KMXA, 2OQPA, 1EIKA, 2KQPA, 1AHOA, 1MHNA, 1HGVA, 2YS0A, 1VIBA, 3PM2A, 2L04A, 2BKDN, 1A6CA, 2FC3A, 1IS1A, 1A8QA, 1OMPA, 1PM6A, 3HAKA, 2JTYA, 1RHDA, 2JQYA, 1NXIA, 1WK1A, 1T45A, 2LQ4p, 2FJLA, 1C44A, 1YPCI, 4HJCA, 2L1PA, 6RHNA, 1LNSA, 2LCYA, 1RQSA, 1X4TA, 2D46A, 2IUEA, 1QXXA, 1SAPA, 1G62A, 2E63A, 1VDIA, 1QTTA, 2CR7A, 1GM0A, 1T8CA, 3HSFA, 1XU6A, 1UFZA, 2K49A, 2JWGA, 1JBJA, 2RH3A, 1TDPA, 1WWIA, 2KPUA, 1SORA, 1AGXA, 1SBXA, 1KJ6A, 1L6HA, 2E8PA, 2BBXA, 1H4AX, 2GPRA, 1IVZA, 2PTLA, 4DNIA, 2IN2A, 2LMDA, 2LRSA, 1X0HA, 2K7MA, 1VCCA, 2C83A, 1N3HA, 2EE5A, 2KLQA, 3O04A, 2JOVA, 2BFHA, 1VGPA, 1V61A, 2L9DA, 1X3OA, 2F76X, 1HCDA, 2NOCA, 1MR4A, 2E70A, 1M42A, 4ACJA, 2EQOA, 2BVBA, 1AJEA, 2KVAA, 1GYFA, 2NRGA, 1NOAA, 4A53A, 2LL0A, 3DJ9A, 1SSKA, 1RC9A, 2K5PA, 2EKIA, 1IW4A, 1X5BA, 1QW1A, 1QW2A, 2K6GA, 2B3WA, 2KK2A, 2SGAA, 1AKZA, 2JMBA, 1MIXA, 2D5UA, 1HIOA, 2KQ6A, 8OHMA, 1CTOA, 2DJPA, 2E7MA, 2QMVA, 2LYXA, 1YYCA, 2GLEA, 1X0OA, 2KYTA, 2K5EA, 2EVNA, 2LRDA, 2LW3A, 2FJZA, 2K1AA, 1PBNA, 3T7FA, 2DJ1A, 2KT8A, 3JZ9A, 1T2IA, 1WJUA, 1LMZA, 1WITA, 2LQ8A, 2AYAA, 1K19A, 2L08A, 1PRZA, 1Z8SA, 2R6QA, 2K9DA, 2NSNA, 2ARAA, 2VQ4A, 1LKNA, 1G7DA, 1HREA, 1H3QA, 2DI7A, 2KOKA, 3A4CA, 2DAQA, 2JHYA, 2G69A, 2ESKA, 1PC0A, 1J7XA, 1OTPA, 1XAAA, 2KA5A, 2RNNA, 2FZ0A, 1K8VA, 1GYVA, 1BSHA, 1AKOA, 2PNEA, 2QZQA, 2KK4A, 1WYMA,

1ACFA, 1FNAA, 1X51A, 2DCVA, 2L6NA, 1U09A, 1BUOA, 2KMAA, 2COMA,  
1WJTA, 1SS3A, 2LA7A, 3HVMA, 1WHIA, 2L3TA, 1ZWTA, 1N3GA, 1WGOA,  
2PKOA, 1BBGA, 1TKNA, 1NE5A, 2C7HA, 2KX2A, 1LXAA, 2KQRA, 1PS2A,  
1UJRA, 1EHSA, 1YU5X, 2DAWA, 1IUFA, 1PGYA, 1J0TA, 2GGFA, 2DO8A,  
2P25A, 1W0BA, 2KD1A, 1IMTA, 2YRQA, 1ALYA, 1FHOA, 2K73A, 2UWQA,  
2RSXA, 3UFCX, 2JOZA, 2JZAA, 2M4YA, 2CRUA, 1MJZA, 2HJQA, 2JNKA,  
2JOBA, 2JPSA, 1O5TA, 2L5QA, 2YWOA, 1BI5A, 1IEZA, 1URFA, 1T0VA,  
1QKLA, 3FI1A, 1YVCA, 3ETPA, 2V1NA, 2LJKA, 1V5SA, 3JYLA, 3CO1A,  
2RR8A, 1QTSA, 2LQGA, 2DIUA, 2K8PA, 2JVGA, 2DIRA, 1KIVA, 2K4ZA,  
1QK9A, 2BZEA, 1AIWA, 2HVMA, 1BDSA, 4E2UA, 2KZ0A, 1RHXA, 1T17A,  
1YSYA, 2C55A, 2KCQA, 2KZ3A, 1GQZA, 1OWAA, 1YUBA, 1EGXA, 1FHLA,  
2KJQA, 4J5QA, 2YV0X, 1LQCA, 2J9VA, 1A63A, 1Q59A, 2CR2A, 1HHNA,  
1K8BA, 1GVPA, 2K24A, 2YGSA, 3DJNB, 2RSTA, 1FGPA, 2K5SA, 2KRCA,  
1ZDVA, 1EHXA, 2HE7A, 2CP8A, 1APCA, 2KHQA, 3R6DA, 2EQXA, 2YRVA,  
2KEQA, 4AQZA, 2PPNA, 1MSCA, 1WH2A, 1F5XA, 1GVLA, 1QTOA,  
1UDMA, 2LSHA, 2HZDA, 2DIQA, 1UOYA, 1WM3A, 2LVXA, 2KT6A, 2ICTA,  
3DPAA, 1IADA, 1UKFA, 1WGBA, 2RRLA, 1M2EA, 1B75A, 2CPTA, 3M66A,  
2L81A, 1L7YA, 3E7RL, 2I8LA, 2KC5A, 1RYKA, 1GHTA, 2LV4A, 2AKKA,  
3PFMA, 3LFOA, 2DKQA, 2LNMA, 2DUNA, 1EOVA, 1CKRA, 1UFGA,  
2KJIA, 1LQ7A, 1G5ZA, 2LQ3A, 2FXTA, 2X43S, 1BVHA, 1XKEA, 1WHRA,  
2JZ6A, 1SE7A, 4J4RA, 2V31A, 2CG7A, 1GYZA, 1NFAA, 2JSNA, 2JZTA,  
1ZAQA, 2LN7A, 1G9PA, 1BHEA, 1KOEK, 2KQZA, 2DLXA, 2M6YA, 1UG7A,  
1Q38A, 1TJDA, 2RKQA, 2GF5A, 2VKCA, 2K5QA, 3IH4A, 2XK0A, 2CASA,  
1MZLA, 1EPSA, 2DBHA, 2CQAA, 2LHTA, 2PY1A, 1KJSA, 2DBGA, 2J6BA,  
1FYXA, 3NPOA, 2RM8A, 1XN7A, 1OXDA, 1DOVA, 1IOJA, 1EWIA, 1PBVA,  
2RN4A, 1RL0A, 1AJMA, 2FPHX, 1QSVA, 1UF0A, 2IFSA, 2LFCA, 1TE7A,  
2VIMA, 2B5XA, 1ON4A, 1EW4A, 2KMSA, 2KATA, 2M4HA, 1N6UA, 2LNCA,  
2L1QA, 2L2CA, 2JVMA, 1HKAA, 2LKGA, 1E8RA, 1N6ZA, 2B9KA, 1V9VA,  
2BK2A, 1C01A, 2KKVA, 2ENQA, 2QT4A, 3MX7A, 2KNIA, 2KRHA, 1WXMA,  
1I2TA, 1QM9A, 1ATAA, 2KJXA, 1WRYA, 1K0HA, 2FB9A, 1N91A, 2FMCA,  
3N0KA, 2DHZA, 2D49A, 2OKTA, 2KWYA, 1PV0A, 4AOGA, 1BQCA, 1GO5A,  
1Z9BA, 1ZHCA, 3ZPMA, 2DHSA, 1NHLLA, 2WQGA, 2KUQA, 1E0HA, 1N88A,  
1I60A, 1MWPA, 4ETXA, 3ZSLA, 2LY8A, 1WJKA, 3QYUA, 2M4VA, 1BZKA,  
1T50A, 2K4NA, 1WJRA, 2CKXA, 1CKVA, 1EJ5A, 1ZUGA, 2KL2A, 1ERDA,  
2KGFA, 1TJEA, 1LXLA, 2M47A, 1JI6A, 1R36A, 2JOYA, 2KEYA, 1WXAA,  
2DOAA, 4JZCA, 1X52A, 1WKIA, 1XWEA, 2L1AA, 2UWRA, 1CEJA, 2L1TA,  
1XNEA, 1P4XA, 2JXWA, 2Z4DA, 1A9VA, 1F6WA, 1WICA, 1YO4A, 4ULLA,  
1O6XA, 3KB5A, 1KS9A, 1CZ4A, 2GBSA, 2JWHA, 1DVNA, 2K0RA, 2K5RA,  
2YUDA, 1UHUA, 1JYTA, 1UG8A, 1V63A, 2KK1A, 2KLLA, 2DAVA, 1YALA,  
1BGFA, 2RRDA, 2LOJA, 3SEBA, 2KNQA, 4AR0A, 2LN3A, 1ESXA, 1RZWA,  
1MV3A, 2KIWA, 2JYEA, 2DA7A, 2KQ1A, 3MTVA, 1AYDA, 3T5BA, 1AGGA,

2H85A, 2K0QA, 1WF9A, 1EDXA, 3H8NA, 1FMYA, 1WGPA, 1COUA, 2YTUA, 1QHKA, 2C0SA, 1RIPA, 2CRVA, 2K4FA, 2K27A, 1Q2UA, 1A6SA, 1OQAA, 1S7IA, 2RM4A, 1RY3A, 2LAOA, 3VORA, 1YNXA, 2Q34A, 1MJCA, 1HJ0A, 1IP9A, 3F7MA, 1N3KA, 1WIXA, 2LAEA, 1A3HA, 2RNOA, 1WU3I, 3DQPA, 1WGWA, 2LWYA, 3H7ZA, 3LIGA, 1PC2A, 1R8NA, 1SB6A, 2E60A, 1WH4A, 1MP1A, 2K4EA, 2L95A, 2TMPA, 1YUWA, 3NSMA, 1VZSA, 1WWBX, 2K19A, 2COSA, 2RLOA, 2JV8A, 1YW5A, 2M0XA, 1ZU2A, 1U5MA, 2K13X, 1Q5FA, 2W0GA, 1OJGA, 2FE9A, 1AOYA, 3ONJA, 2LTFA, 2LD3A, 2ERFA, 2KQ2A, 2CTQA, 1BBYA, 1WWUA, 1LMIA, 1AA3A, 2LUWA, 1Y6IA, 2PLFA, 1PDBA, 2JMUA, 1WGSA, 2LG7A, 2OT2A, 1PJBA, 2OHEA, 2LIEA, 2KT9A, 2JA9A

**PDB IDs of 138 Group I Proteins:**

2ZKQq, 4KZYe, 2H4MC, 3IOZB, 4IJ3C, 3IFNP, 3ZMSC, 3BBO6, 4KP3E, 3TPMB, 3DBOA, 3KL4B, 3GZ2P, 4C2M4, 2JDII, 4GMNB, 2M14B, 2RPQB, 4DEYB, 2MBHB, 2O8GI, 3SL9C, 4BXZX, 4BPE9, 4FBWC, 4A1GE, 2P58B, 3T0YB, 2GRXC, 2XG1Y, 3N7NE, 2PQNB, 2I32E, 1Z56A, 1ONVB, 2JZ3A, 2L0YB, 3ZEYR, 1XOUA, 3IYNN, 2WSCE, 4BPE0, 3QV1G, 1OEDC, 4H62K, 2F93B, 4C3ID, 4HB1A, 3S6PE, 4C0TA, 4G91A, 2NPIC, 1AYM4, 3SJHB, 1QZ7B, 1YTVM, 2XPIB, 4BKGA, 2WSCN, 3T5XB, 3FFDP, 3TVTB, 2CLYA, 2XQNA, 4C2MD, 1CQTI, 4B6HC, 3IZRb, 1YD7A, 4B4TS, 4GOWA, 2KXCB, 2WWBC, 2XB2G, 3KYSB, 1DP5B, 4BZIF, 2PRGC, 3W3WB, 2QNAB, 1H8BB, 3BTPB, 2WSCH, 4BXTA, 3IAXB, 4HQJE, 2ZNLB, 3J3Bb, 2WZLA, 3EVYA, 3TDNA, 4E05I, 1FH1A, 4KZYf, 4BYNq, 4KBBC, 3IECE, 3ZEDD, 4BQ6C, 4KIX6, 3F1IC, 3MN7S, 3UTMC, 3ABDX, 4C5HB, 1SCFA, 3M4WE, 2K3JA, 3J3Ah, 2CKZA, 1I7WB, 1UF2K, 4ACOA, 3KNDB, 2KSEA, 4AXGC, 3PMKN, 2LOXB, 3EX7D, 4I6MD, 3PVLB, 1XF5P, 4C2M2, 3E50C, 3V62C, 4HSUB, 1BYYA, 4JPBA, 4AYBQ, 4CCFA, 1H6WA, 3J3Bu, 4JHDC, 1VSZR, 4FTBD, 3QHED, 4GXBB, 2JYVA

**DisProt IDs of 91 Group II Proteins:**

DP00001, DP00002, DP00005, DP00006, DP00008, DP00015, DP00017, DP00024, DP00027, DP00028, DP00038, DP00039, DP00040, DP00041, DP00042, DP00057, DP00058, DP00068, DP00069, DP00070, DP00116, DP00122, DP00124, DP00128, DP00132, DP00140, DP00143, DP00145, DP00146, DP00147, DP00148\_C004, DP00158, DP00163, DP00170, DP00174, DP00180\_C003, DP00185, DP00186, DP00193, DP00198, DP00199, DP00205, DP00214, DP00216, DP00219, DP00222, DP00227, DP00232, DP00242, DP00253, DP00288, DP00303, DP00330, DP00332, DP00347, DP00357, DP00359, DP00367, DP00372, DP00387, DP00421, DP00441, DP00465, DP00510, DP00521, DP00531, DP00532, DP00535, DP00538, DP00540, DP00544, DP00546, DP00550, DP00560\_C007, DP00563, DP00564, DP00584,

DP00586, DP00592, DP00606, DP00613, DP00626, DP00650, DP00657, DP00663,  
DP00664, DP00665, DP00674\_C001, DP00675\_C002, DP00694, DP00723
